# Supplementary material for: Aberrantly expressed long noncoding RNAs in human intervertebral disc degeneration: a microarray related study
Source: PubMed Central journal article supplement (PMC4201740; doi:10.1186/s13075-014-0465-5), 2014-10-04

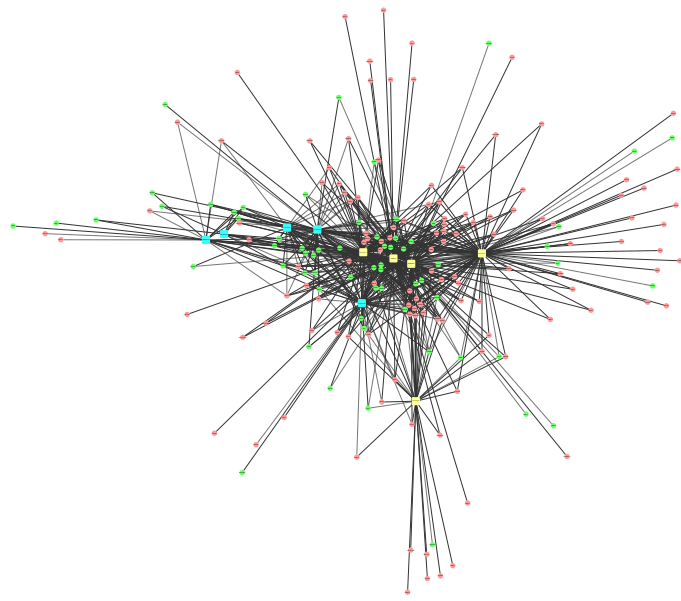

Supplement: 13075_2014_465_MOESM5_ESM.pdf [file 13075_2014_465_MOESM5_ESM.pdf]
